# Supplementary material for: Mental health of working parents during the COVID-19 pandemic: Can resilience buffer the impact of psychosocial work stress on depressive symptoms?
Source: Research Square preprint supplement (doi:10.21203/rs.3.rs-1325009/v1), 2022-02-16
Supplement: Supplementary file [file 0cee5ee522bc3980fee0aca7.pdf]

**Supplementary Figure 1**  
 Flowchart of participation rate and exclusion criteria resulting in final sample

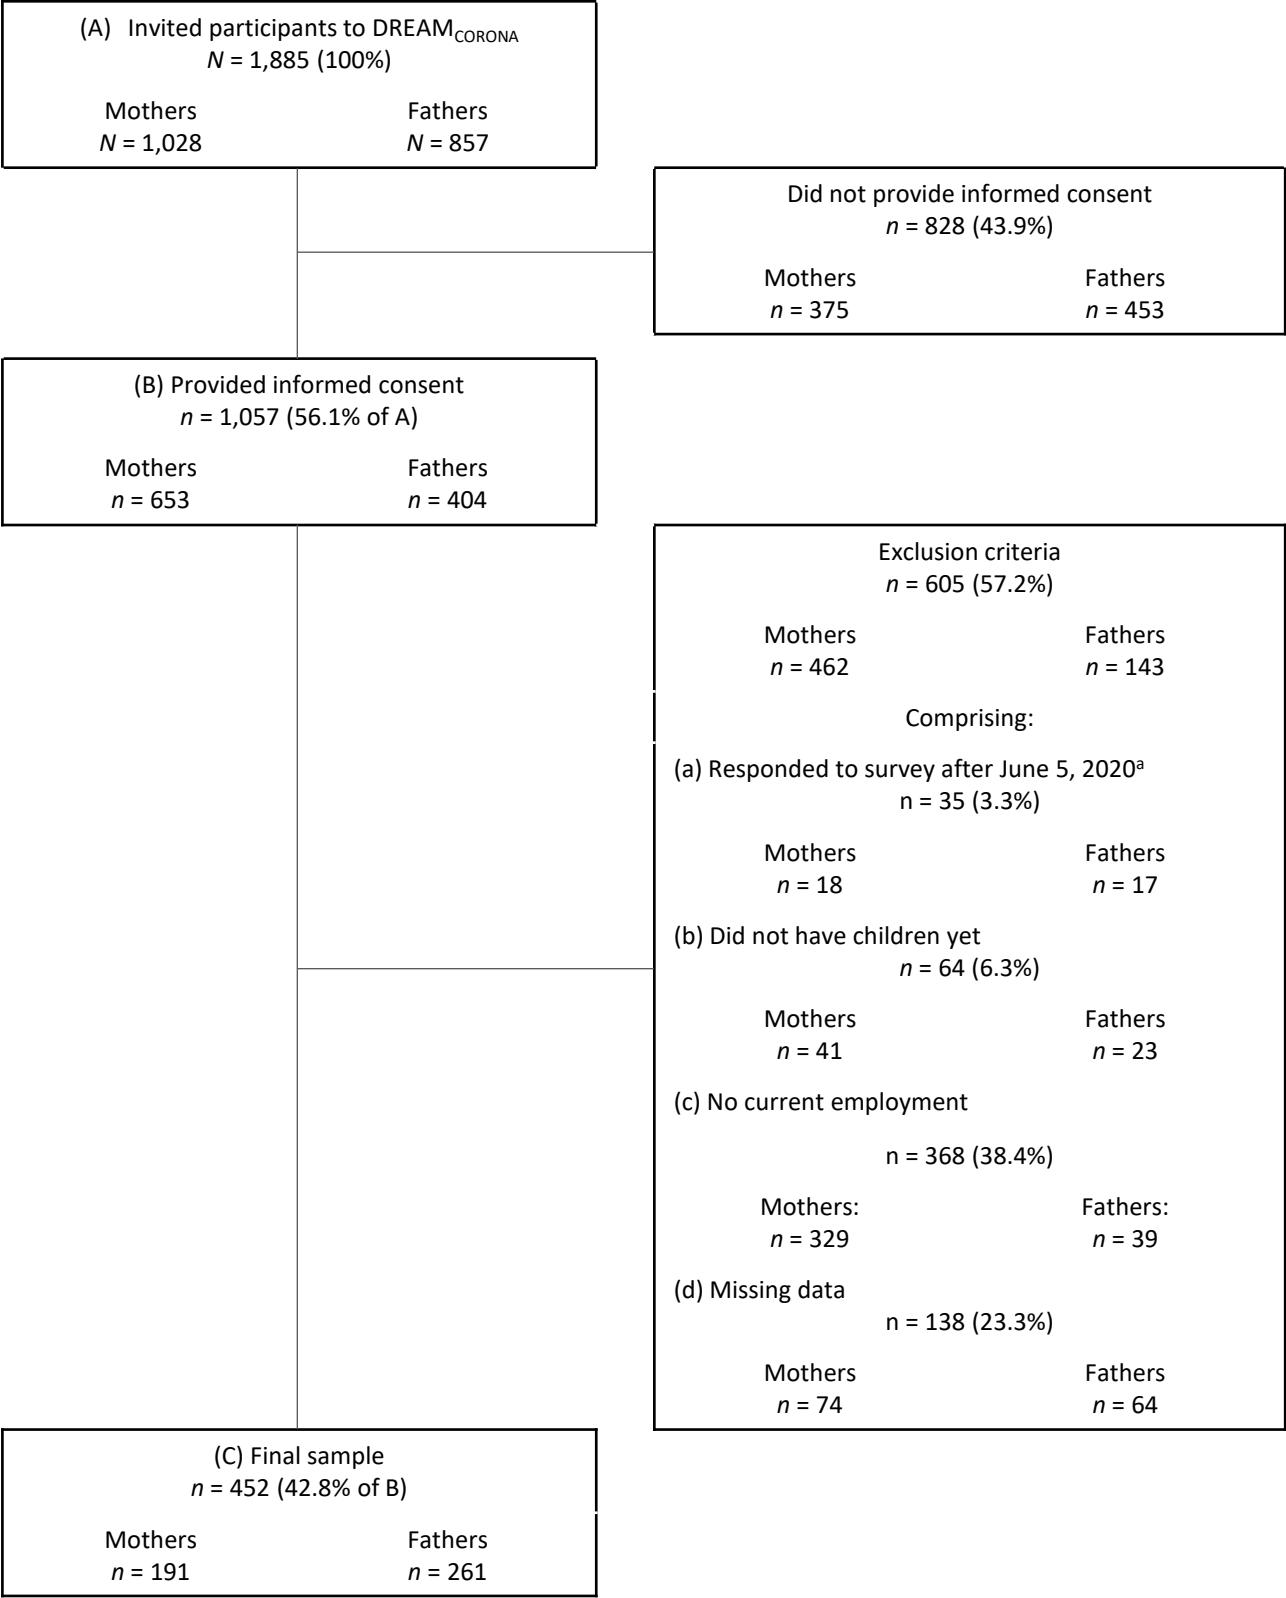

*Note.* Participation in the DREAM<sub>CORONA</sub> survey was possible from May 12 to October 1, 2020.  
<sup>a</sup>To control for changes in political restrictions, participants who responded to the survey after June 5, 2020, were excluded as with June 6, 2020, new Covid-19 regulations came into effect
